# Supplementary material
Source: PubMed Central journal article supplement (PMC8453408)
Supplement: deaa308_supplementary_figures1.pdf [file deaa308_supplementary_figures1.pdf]

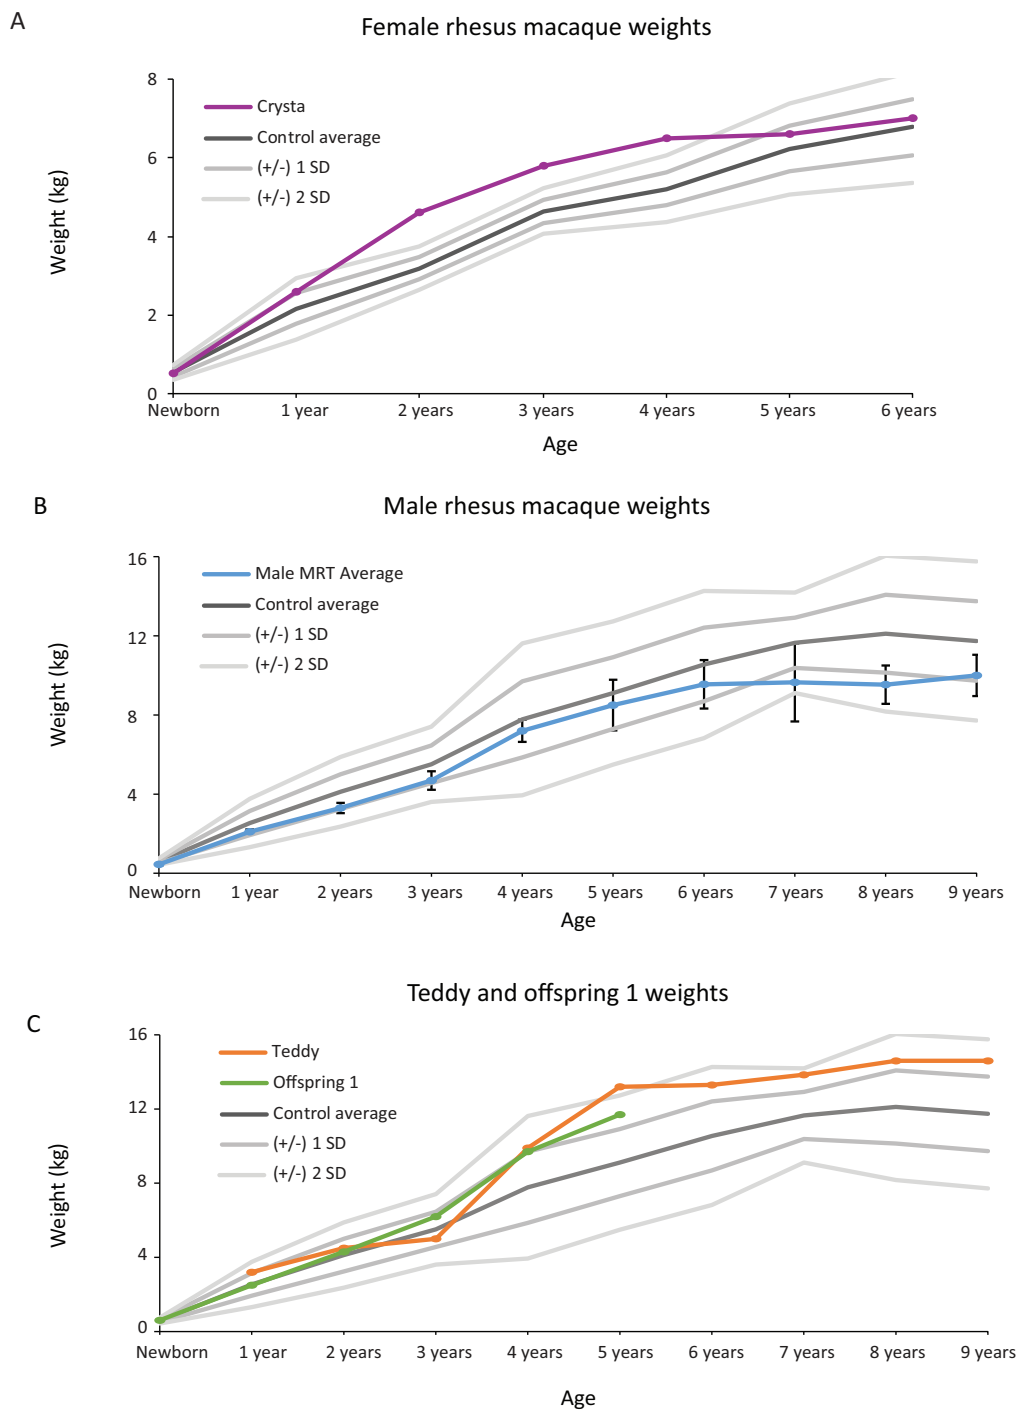

**Supplementary Figure S1. Weight gains of MRT monkeys.** (A) Female rhesus macaque body weight gains with age. (B) Male rhesus macaque body weight changes with age. In A and B, weight measurements of FI mitochondrial replacement therapy (MRT) monkeys have been taken regularly throughout their lives. All MRT monkeys fall within the SD for control monkeys of the same age. Error bars in B represent the mean  $\pm$  SD ( $n = 4$ , biological replicates). (C) Teddy and Teddy's offspring 1 (in [Supplementary Table SV](#)) body weight gains with age.
