# Supplementary material
Source: PubMed Central journal article supplement (PMC8453408)
Supplement: deaa308_supplementary_figures2.pdf [file deaa308_supplementary_figures2.pdf]

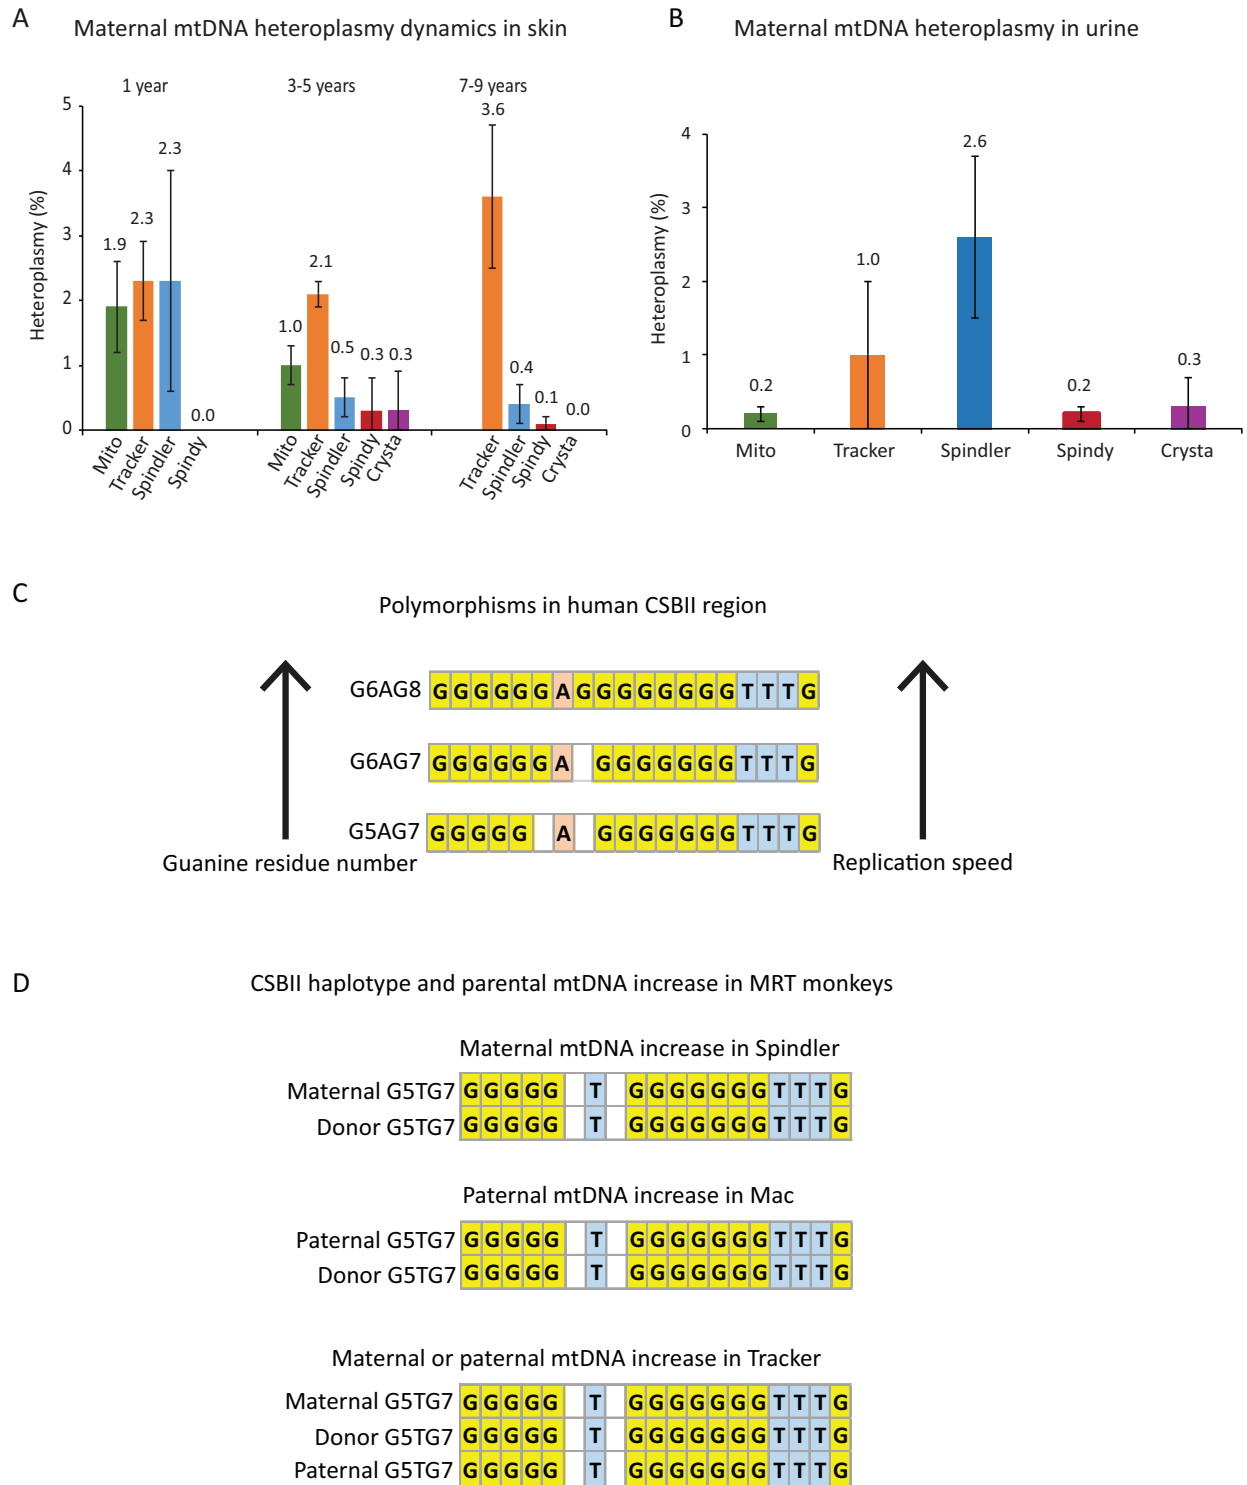

**Supplementary Figure S2. Maternal carry-over mtDNA levels in MRT monkeys.** (A) Maternal mtDNA heteroplasmy measured by amplification refractory mutation system (ARMs)-quantitative (q) PCR (ARMs-qPCR) in skin of mitochondrial replacement therapy (MRT) monkeys at different age. The data in A represents the mean  $\pm$  SD ( $n = 3$  per monkey, biological replicates). (B) Maternal mtDNA heteroplasmy detected by ARMs-qPCR in urine samples of MRT monkeys. The data represent the mean  $\pm$  SD ( $n = 3$  per monkey, biological replicates). (C) Sequence polymorphism in the conserved sequence box II (CSBII) region of human mtDNA. Increase in the number of guanine residues positively correlates with mtDNA replication efficiency. (D) CSBII sequences in MRT monkeys were identical.
