# Supplementary material
Source: PubMed Central journal article supplement (PMC8453408)
Supplement: deaa308_supplementary_figures3.pdf [file deaa308_supplementary_figures3.pdf]

human reproduction SUPPLEMENTARY DATA

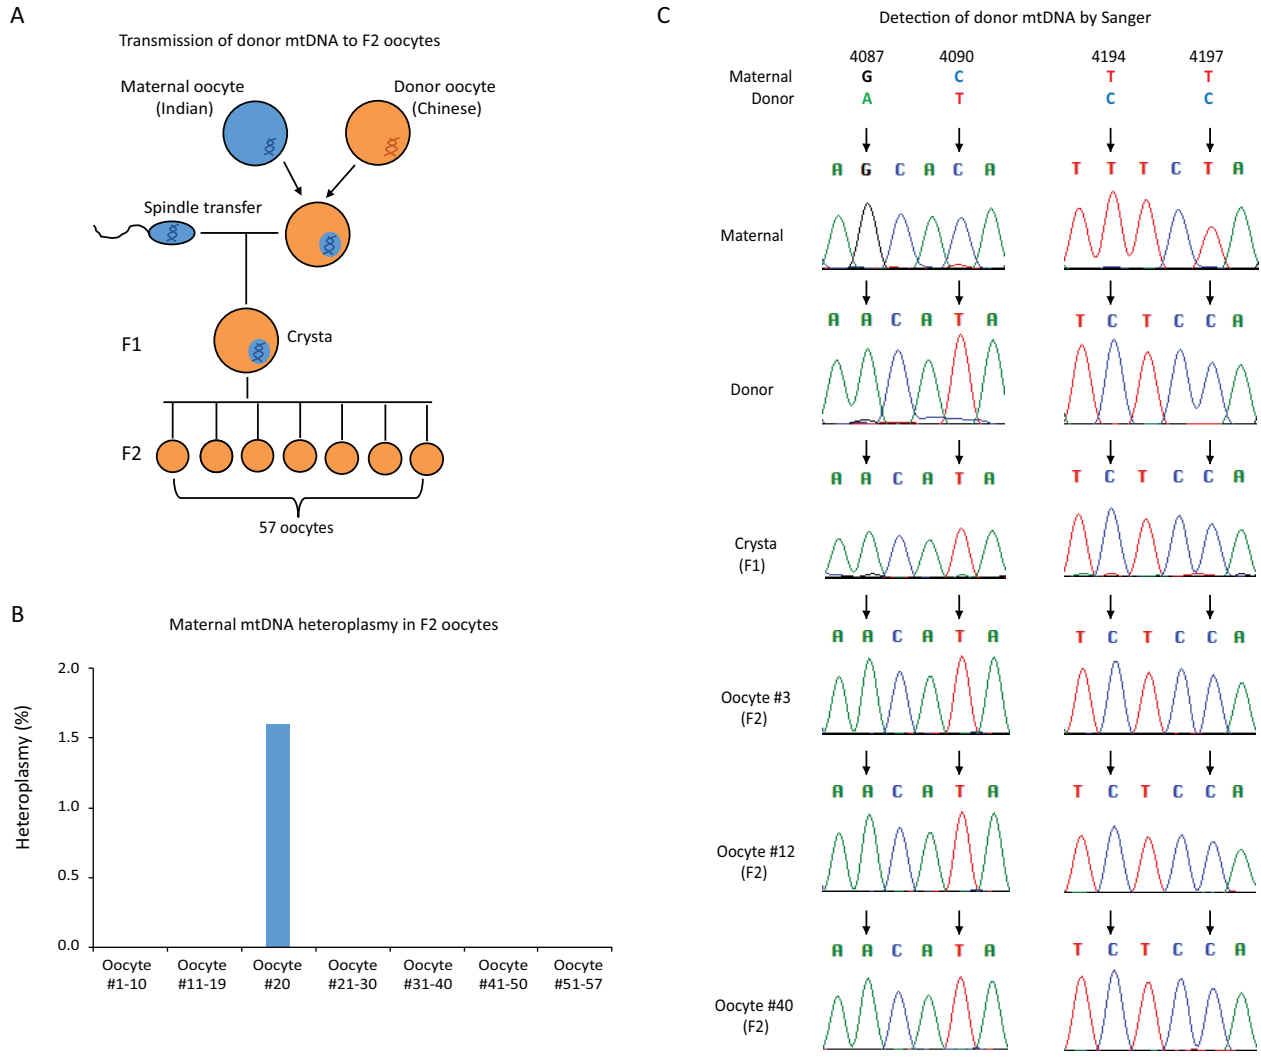

**Supplementary Figure S3. Donor and maternal mtDNA in oocytes of a MRT female.** (A) Diagrammatic representation of parental mtDNA transmission in Crysta. (B) Among 57 oocytes collected from Crysta, only one had a detectable amount of the maternal mtDNA heteroplasmy at 1.6%. (C) Sanger sequencing chromatograms in oocytes from Crysta showing presence of donor mtDNA.
